# Supplementary material
Source: ML conference proceedings conference paper supplement (https://openreview.net/forum?id=tNMPcy9PovC)
Supplement: supplementary_material [file attachment]

## A Minor dataset modifications

**Deduplication.** Through the systematic analysis and validation of the chosen datasets, we noticed one of the commonly appearing defects is the presence of duplicated annotations. We decided to remove these duplicates from InfographicsVQA (14 annotations from train, two from the dev set), DocVQA (four from train and test sets each), TabFact (309 from train, 53 from dev, and 52 the test set), and WikiTableQuestions (one annotation from each train and test sets).

## B Tasks processing and reformulation

Since part of the datasets were reformulated or modified to improve the benchmark quality or align the task with the Document Understanding paradigm, we describe the introduced changes in detail below.

**WikiTableQuestions★.** We prepare input documents by rendering table-related HTML distributed by authors in *wkhtmltopdf* and crop the resulting files with *pdfcrop*. As these code excerpts do not contain *head* tag with JavaScript and stylesheet references, we use the header from the present version of the Wikipedia website.

Approximately 10% of tables contained at least one *img* tag with a source that is no longer reachable. It results in a question mark icon displayed instead of the image and does not impact the evaluation procedure since the questions here do not require image comprehension.

| Year | Venue        | Winners          | Runner-up              | 3rd place               |
|------|--------------|------------------|------------------------|-------------------------|
| 2005 | Pardubice    | Poland (41 pts)  | Sweden (35 pts)        | Denmark (24 pts)        |
| 2006 | Rybnik       | Poland (41 pts)  | Sweden (27 pts)        | Denmark (26 pts)        |
| 2007 | Abensberg    | Poland (40 pts)  | Great Britain (36 pts) | Czech Republic (30 pts) |
| 2008 | Holsted      | Poland (40 pts)  | Denmark (39 pts)       | Sweden (38 pts)         |
| 2009 | Gorzów Wlkp. | Poland (57 pts)  | Denmark (45 pts)       | Sweden (32 pts)         |
| 2010 | Rye House    | Denmark (51 pts) | Sweden (37 pts)        | Poland (35 pts)         |
| 2011 | Balakovo     | Russia (61 pts)  | Denmark (31 pts)       | Ukraine (29+3 pts)      |
| 2012 | Gniezno      | Poland (61 pts)  | Australia (44 pts)     | Sweden (26 pts)         |
| Year | Venue        | Winners          | Runner-up              | 3rd place               |

Figure 4: Document in WikiTableQuestions reformulated as Document Understanding.

(Question) After their first place win in 2009, how did Poland place the next year at the speedway junior world championship? (Answer) 3rd place

The original WTQ dataset consists of *training*, *pristine-seen-tables*, and *pristine-unseen-tables* subsets. We treat *pristine-unseen-tables* as a test set and create new training and development sets by rearranging data from *training* and *pristine-seen-tables*. The latter operation is dictated by the leakage of documents in the original formulation, i.e., we consider it undesirable for a document to appear in different splits, even if the question differs. The resulting dataset consists of approximately 2100 documents divided in the proportion of 65%, 15%, 20% into training, development, and test sets.

**TabFact★.** As the authors of TabFact distribute only CSV files, we resorted to HTML from the WikiTables dump their CSV were presumably generated from.<sup>4</sup> As Chen et al. [6] dropped some of the columns present in used WikiTable tables, we remove them too, to ensure compatibility with the original TabFact. Rendered files are used analogously to the case of WTQ.

Results differ from TabFact in several aspects, i.e., text in our variant is not normalized, it includes the original formatting, and the tables are more complex due to restoring the original cell merges. All mentioned differences are desired, as we intended to consider raw, unprocessed files without any heuristics or normalization applied.

Another difference we noticed is that tables in the original TabFact are sometimes one row shorter, i.e., they do not contain the last row present in the WikiTable dump. As it should not impact expected answers, we decided to maintain the fidelity to Wikipedia and use the complete table.

We use the original splits into training, development, and test sets.

<sup>4</sup><http://websail-fe.cs.northwestern.edu/TabEL/tables.json.gz>

| Superleague (Final League) Table (Places 1-6) |                         |                |     |       |      |        |         |            |              |
|-----------------------------------------------|-------------------------|----------------|-----|-------|------|--------|---------|------------|--------------|
|                                               | Nation                  | v t e<br>Games |     |       |      | Points |         |            | Table points |
|                                               |                         | Played         | Won | Drawn | Lost | For    | Against | Difference |              |
| 1                                             | VVA-Podmoskovye Monino  | 10             | 9   | 0     | 1    | 374    | 119     | +255       | 37           |
| 2                                             | Krasny Yar Krasnoyarsk  | 10             | 6   | 0     | 4    | 198    | 255     | -57        | 28           |
| 3                                             | Slava Moscow            | 10             | 5   | 1     | 4    | 211    | 226     | -15        | 26           |
| 4                                             | Yenisey-STM Krasnoyarsk | 10             | 5   | 0     | 5    | 257    | 158     | +99        | 25           |
| 5                                             | RC Novokuznetsk         | 10             | 4   | 1     | 5    | 168    | 194     | -26        | 23           |
| 6                                             | Imperia-Dynamo Penza    | 10             | 0   | 0     | 10   | 138    | 395     | -257       | 10           |

Figure 5: Document in TabFact reformulated as Document Understanding.

(Claim) To calculate table point, a win be worth 3, a tie be worth 1 and a loss be worth 0

644 **DeepForm★**. The original DeepForm dataset consists of 2012, 2014, and 2020 subsets differing  
 645 in terms of annotation quality and documents' diversity. We decided to use only the 2020 subset  
 646 as for 2014, and 2020 annotations were prepared either automatically or by volunteers, leading to  
 647 questionable quality. The selected subset was randomly divided into training, development and test  
 648 set.

649 We noticed several inconsistencies during the initial analysis that lead us to the manual correction  
 650 of autodetected: (1) invalid date format; (2) flight start dates earlier than flight end; (3) documents  
 651 lacking one or more data points.

| COXREPS REP BUYLINES |          |          |        |      |               |             |          |          |             |               |                           |        |        |              |
|----------------------|----------|----------|--------|------|---------------|-------------|----------|----------|-------------|---------------|---------------------------|--------|--------|--------------|
| Mod Code             | Buy Line | Day/Time | Length | Rate | Starting Date | Ending Date | # of Wks | Spt/Week | Total Spots | Total Dollars | Program Name              | Rating | Imprsn | Reps: Last   |
| 1                    | Tue      | 5-6A     | 30S    | \$10 | May12/20      | May12/20    | 1        | 1        | 1           | \$10          | NEWS10 GOOD MORN -SA      | 0.9    | 2.1    | 0.9 May04/20 |
| 2                    | Wed      | 5-6A     | 30S    | \$10 | May13/20      | May13/20    | 1        | 1        | 1           | \$10          | NEWS10 GOOD MORN -SA      | 0.9    | 2.1    | 0.9 May04/20 |
| 3                    | Thur     | 5-6A     | 30S    | \$10 | May14/20      | May14/20    | 1        | 1        | 1           | \$10          | NEWS10 GOOD MORN -SA      | 0.9    | 2.1    | 0.9 May04/20 |
| 4                    | Mon      | 5-6A     | 30S    | \$10 | May18/20      | May18/20    | 1        | 1        | 1           | \$10          | NEWS10 GOOD MORN -SA      | 0.9    | 2.1    | 0.9 May04/20 |
| 5                    | Wed      | 6-7A     | 30S    | \$15 | May13/20      | May13/20    | 1        | 1        | 1           | \$15          | NEWS10 GOOD MORN -6A      | 2.2    | 5.3    | 2.2 May04/20 |
| 6                    | Thu      | 6-7A     | 30S    | \$15 | May14/20      | May14/20    | 1        | 1        | 1           | \$15          | NEWS10 GOOD MORN -6A      | 2.2    | 5.3    | 2.2 May04/20 |
| 7                    | Fri      | 6-7A     | 30S    | \$15 | May15/20      | May15/20    | 1        | 1        | 1           | \$15          | NEWS10 GOOD MORN -6A      | 2.2    | 5.3    | 2.2 May04/20 |
| 8                    | Mon      | 6-7A     | 30S    | \$15 | May18/20      | May18/20    | 1        | 1        | 1           | \$15          | NEWS10 GOOD MORN -6A      | 2.2    | 5.3    | 2.2 May04/20 |
| 9                    | Tue      | 7-9A     | 30S    | \$20 | May12/20      | May12/20    | 1        | 1        | 1           | \$20          | CBS THIS MORNING          | 3.0    | 7.3    | 3.0 May04/20 |
| 10                   | Thu      | 7-9A     | 30S    | \$20 | May14/20      | May14/20    | 1        | 1        | 1           | \$20          | CBS THIS MORNING          | 3.0    | 7.3    | 3.0 May04/20 |
| 11                   | Mon      | 7-9A     | 30S    | \$20 | May18/20      | May18/20    | 1        | 1        | 1           | \$20          | CBS THIS MORNING          | 3.0    | 7.3    | 3.0 May04/20 |
| 12                   | Tue      | 9-10A    | 30S    | \$10 | May12/20      | May12/20    | 1        | 1        | 1           | \$10          | FAMILY FEUD/ AMERICA SAYS | 2.0    | 4.8    | 2.0 May04/20 |
| 13                   | Thu      | 9-10A    | 30S    | \$10 | May14/20      | May14/20    | 1        | 1        | 1           | \$10          | FAMILY FEUD/ AMERICA SAYS | 2.0    | 4.8    | 2.0 May04/20 |
| 14                   | Fri      | 9-10A    | 30S    | \$10 | May15/20      | May15/20    | 1        | 1        | 1           | \$10          | FAMILY FEUD/ AMERICA SAYS | 2.0    | 4.8    | 2.0 May04/20 |

Figure 6: Single page from document in DeepForm.

652 In addition to the improved 2020 subset, we manually annotated one hundred 2012 documents, as  
 653 they can pose different challenges (contain different document templates, handwriting, have lower  
 654 image quality). They were used to extend development and test set. The final dataset consists of 700  
 655 training, 100 development, and 300 test set documents.

656 **PWC★**. The authors of AxCell relied on PWC Leaderboards and LinkedResults datasets [24].  
 657 The original formulation assumes extraction of (*task*, *dataset*, *metric*, *model*, *score*) tuples from  
 658 a provided table. In contrast, we reformulate the task as Document Understanding and provide a  
 659 complete paper as input instead. These are obtained using arXiv identifiers available in the PWC  
 660 metadata. Consequently, the resulting task is an end-to-end Key Information Extraction from real-  
 661 world scientific documents.

662 Whereas LinkedResults was annotated consistently, the PWC is of questionable quality as it was  
 663 obtained from leaderboards filled by Papers with Code visitors without a clear guideline or annotation  
 664 rules. The difference between the two is substantial, i.e., the agreement in terms of F1 score between  
 665 publications present in both PWC and LinkedResults is lower than 0.35. We attribute this mainly to

666 flaws in the PWC dataset, such as missing records, inconsistent normalization and the difficulty of  
667 the task itself.

668 Consequently, we decided to perform its manual re-annotation assuming that: (1) The best result for  
669 a proposed model variant on the single dataset has to be annotated, e.g., if two models with different  
670 parameter sizes were present in the table, we report only the best one. (2) Single number is preferred  
671 (we take the average over multiple split or parts of the dataset if possible). (3) When results from  
672 the test set are available, we prefer them and don't report results from the validation set. (4) We add  
673 multiple value variants when possible. (5) We include information on used validation/dev/test split in  
674 the dataset description wherever applicable. (6) We don't report results on the train set. (7) We don't  
675 annotate results not appearing in the table. (8) We filter out publications that are hard to annotate  
676 even for a human.

677 Interestingly, human scores on PWC are relatively low in terms of F1 value. This can be attributed to  
678 unrestricted nature of particular properties, e.g., *accuracy* and *average accuracy* are equally valid  
679 metric values. Similarly, *Action Recognition*, *Action Classification*, and *Action Recognition* are  
680 equally valid task names. At the same time, it is impossible to provide all answer variants during the  
681 preparation of the gold standard. We decided to keep the dataset in the benchmark as it is extremely  
682 demanding, and there is still a large gap between humans' and models' performance (See Table 3).

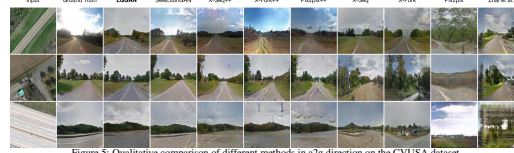

Figure 5: Qualitative comparison of different methods in a2g direction on the CVUSA dataset.

Table 2: Quantitative evaluation of the CVUSA dataset in a2g direction. For all metrics except KL score, higher is better. (+) Inception Score for real (ground truth) data is 4.8741, 3.2959 and 4.9943 for all, top-1 and top-5 setups, respectively.

| Method            | Accuracy (%) |       | Inception Score <sup>+</sup> |       | SSIM   | PSNR   | SD     | KL     |         |         |               |
|-------------------|--------------|-------|------------------------------|-------|--------|--------|--------|--------|---------|---------|---------------|
|                   | Top-1        | Top-5 | All                          | Top-5 |        |        |        |        |         |         |               |
| Zhu et al. [52]   | 13.97        | 14.03 | 82.09                        | 52.29 | 1.8434 | 1.5771 | 1.8666 | 0.4147 | 17.4886 | 16.6184 | 27.43 ± 1.63  |
| Pix2pix [21]      | 7.33         | 9.25  | 25.81                        | 32.67 | 1.2771 | 2.2219 | 3.4312 | 0.3923 | 17.6578 | 18.5239 | 59.81 ± 2.12  |
| X-Seq [17]        | 0.29         | 0.21  | 6.44                         | 9.08  | 1.7755 | 1.4145 | 1.7791 | 0.3451 | 17.6201 | 16.9919 | 414.25 ± 2.37 |
| X-Fork [16]       | 20.58        | 31.24 | 50.51                        | 63.66 | 3.4432 | 2.5447 | 3.5567 | 0.4356 | 19.0509 | 18.6706 | 11.71 ± 1.55  |
| X-Seq [16]        | 15.08        | 24.14 | 42.91                        | 54.41 | 3.8151 | 2.9738 | 4.0877 | 0.4231 | 18.9867 | 18.4778 | 15.52 ± 1.72  |
| Pix2pix++ [21]    | 26.45        | 41.87 | 57.26                        | 72.87 | 3.2592 | 2.4175 | 3.5078 | 0.4617 | 21.5739 | 18.9044 | 9.47 ± 1.69   |
| X-Fork++ [16]     | 31.03        | 49.65 | 64.47                        | 81.16 | 3.3758 | 2.5375 | 3.5711 | 0.4769 | 21.6504 | 18.9056 | 7.18 ± 1.56   |
| X-Seq++ [16]      | 34.69        | 54.61 | 67.12                        | 83.46 | 3.3919 | 2.5474 | 3.4858 | 0.4740 | 21.6713 | 18.9007 | 5.39 ± 1.31   |
| SelectionGAN [43] | 41.52        | 65.51 | 74.32                        | 89.46 | 3.8074 | 2.7181 | 3.9197 | 0.5323 | 23.4466 | 19.6100 | 2.96 ± 0.97   |
| LGGAN (Ours)      | 44.75        | 70.48 | 78.76                        | 93.40 | 3.9100 | 2.8383 | 3.9878 | 0.5218 | 22.5766 | 19.7440 | 2.45 ± 0.95   |

we refer to it as the semantic-guided discriminator  $D_s$ , as shown in Fig. 2. It employs the input semantic map  $S_g$  and the generated image  $I_g^c$  (or the real image  $I_g$ ) as input:

$$\mathcal{L}_{CGAN}(G, D_s) = \mathbb{E}_{S_g, I_g} [\log D_s(S_g, I_g)] + \mathbb{E}_{S_g, I_g^c} [\log(1 - D_s(S_g, I_g^c))]. \quad (8)$$

which aims to preserve scene layout and capture the local-aware information.

For the cross-view image translation task, we also propose another image-guided discriminator  $D_c$ , which takes the conditional image  $I_c$  and the final generated image  $I_g^c$  (or the ground-truth image  $I_g$ ) as input:

$$\mathcal{L}_{CGAN}(G, D_c) = \mathbb{E}_{I_c, I_g} [\log D_c(I_c, I_g)] + \mathbb{E}_{I_c, I_g^c} [\log(1 - D_c(I_c, I_g^c))]. \quad (9)$$

In this case, the total loss of our Dual-Discriminator  $D$  is  $\mathcal{L}_{CGAN} = \mathcal{L}_{CGAN}(G, D_s) + \mathcal{L}_{CGAN}(G, D_c)$ .

#### 4. Experiments

The proposed LGGAN can be applied to different generative tasks such as the cross-view image translation [43] and the semantic image synthesis [32]. In this section we present experimental results and analysis on both tasks.

#### 4.1. Results on Cross-View Image Translation

**Datasets.** We follow [43, 36] and perform the cross-view image translation experiments on the Dayton [46] and CVUSA datasets [49]. The Dayton dataset contains 76,048 images with a train/test split of 55,000/21,048 pairs. The CVUSA dataset consists of 35,532/8,884 image pairs in train/test split.

**Evaluation Metric.** Similarly to [36, 37, 47], we employ Inception Score (IS), Accuracy (Acc.), KL Divergence Score (KL) to evaluate the proposed model. These three metrics evaluate the distance between two different distributions from a high-level feature space. We also employ pixel-level similarity metrics to evaluate our method, i.e., Structural-Similarity (SSIM), Peak Signal-to-Noise Ratio (PSNR) and Sharpness Difference (SD).

**State-of-the-Art Comparisons.** We compare our LGGAN with several recently proposed state-of-the-art methods, i.e., Zhu et al. [52], Pix2pix [21], X-Seq [17], X-Fork [16] and X-Seq [36]. The comparison results are shown in Tables 1 and 2. We can observe that LGGAN consistently outperforms the competing methods on all metrics.

To study the effectiveness of LGGAN, we conduct experiments with the methods using semantic maps and RGB images as input, including Pix2pix++ [21], X-Fork++ [36], X-Seq++ [36] and SelectionGAN [43]. We implement Pix2pix++, X-Fork++ and X-Seq++ using their public source code. Results are shown in Tables 1 and 2. We ob-

Figure 7: Single page from document in PWC.

## 683 C Dataset statistics

684 Chosen datasets represent the plethora of domains, lengths, and document types. This appendix  
685 covers the critical aspects of particular tasks at the population level.

686 Though part of the datasets is limited to one-pagers, the remaining documents range from a few to  
687 few hundred pages (Figure 8). At the same time, there is a great variety in how much text is present  
688 on a single page – we have both densely packed scientific documents and concise document excerpts

689 or infographics. This diversity allows us to measure the ability to comprehend documents depending  
690 on their length.

## 691 **D Details of human performance estimation**

692 Estimation of human performance for PWC, WikiTableQuestions, DeepForm was performed in-  
693 house by professional annotators who are full-time employees of Applica.ai. Before approaching the  
694 process, each of them has to participate in the task-specific training described below.

695 Number of annotated samples depended on task difficulty and the variance of the resulting scores. We  
696 relied on 50 fully annotated papers for the PWC dataset (approx. 150 tuples with five values each),  
697 109 DeepForm documents (532 values), and 300 questions asked to different WikiTableQuestion  
698 tables.

699 Each dataset was approached with two annotators in the LabelStudio tool. Human performance is the  
700 average of their scores when validated against the gold standard.

701 **Training.** Each person participating in the annotation process completed the training consisting of  
702 four stages: (1) Annotation of five random documents from the task-specific development set. (2)  
703 Comparative analysis of differences between their annotations and the gold standard. (3) Annotation  
704 of ten random documents from the task-specific development set and subsequent comparative analysis.  
705 (4) Discussion between annotators aimed at agreeing on the shared, coherent annotation rules.

## 706 **E Annotation of diagnostic subsets**

707 In order to analyze the prepared benchmark and the results of individual models, diagnostic sets were  
708 prepared. These diagnostic sets are subsets of examples selected from the testset for all datasets.

709 When building a taxonomy for diagnostic sets, we adopted two basic assumptions: (1) It must be  
710 consistent across all selected tasks so that at least two tasks can be noted with a given category (2)  
711 It should include as many aspects as possible that are relevant from the perspective of document  
712 understanding problem.

713 Initially, we adopted the taxonomies proposed in DocVQA, Infographics, and TabFact as potential  
714 categories [29, 28, 6]. In the next step, we adjusted our taxonomy to all datasets following the  
715 previously adopted assumptions, distinguishing seven main categories with 25 subcategories (for a  
716 more detailed description of the category (see the section E.1). Then, for each dataset, we prepared  
717 an annotation task in the LabelStudio tool <sup>5</sup> (see example 9) along with an annotation instruction.  
718 Finally, to determine Human performance, the annotation was carried out by a team of specialists  
719 from Applica.ai, where the selected example was noted only by one person.

### 720 **E.1 Taxonomy description**

721 The taxonomy is based on multiple aspects of documents, inputs, and answers and was designed to  
722 be sufficiently generic for future adaptation to other tasks. Here, in each category, we describe the  
723 predicates that annotators followed when classified an example into specific subcategories.

724 **Answer source.** This category is based on the relation between answer and text in the document.

- 725 • Extractive – after lowercasing and white-characters removing, the answer can be exact-matched  
726 in the document.
- 727 • Inferred – other non-extractive cases.

728 **Output format** This category is based on the shape of an output.

- 729 • Single value – the answer consists of only one item.
- 730 • List – multiple outputs are to be provided.

---

<sup>5</sup><https://labelstud.io/>

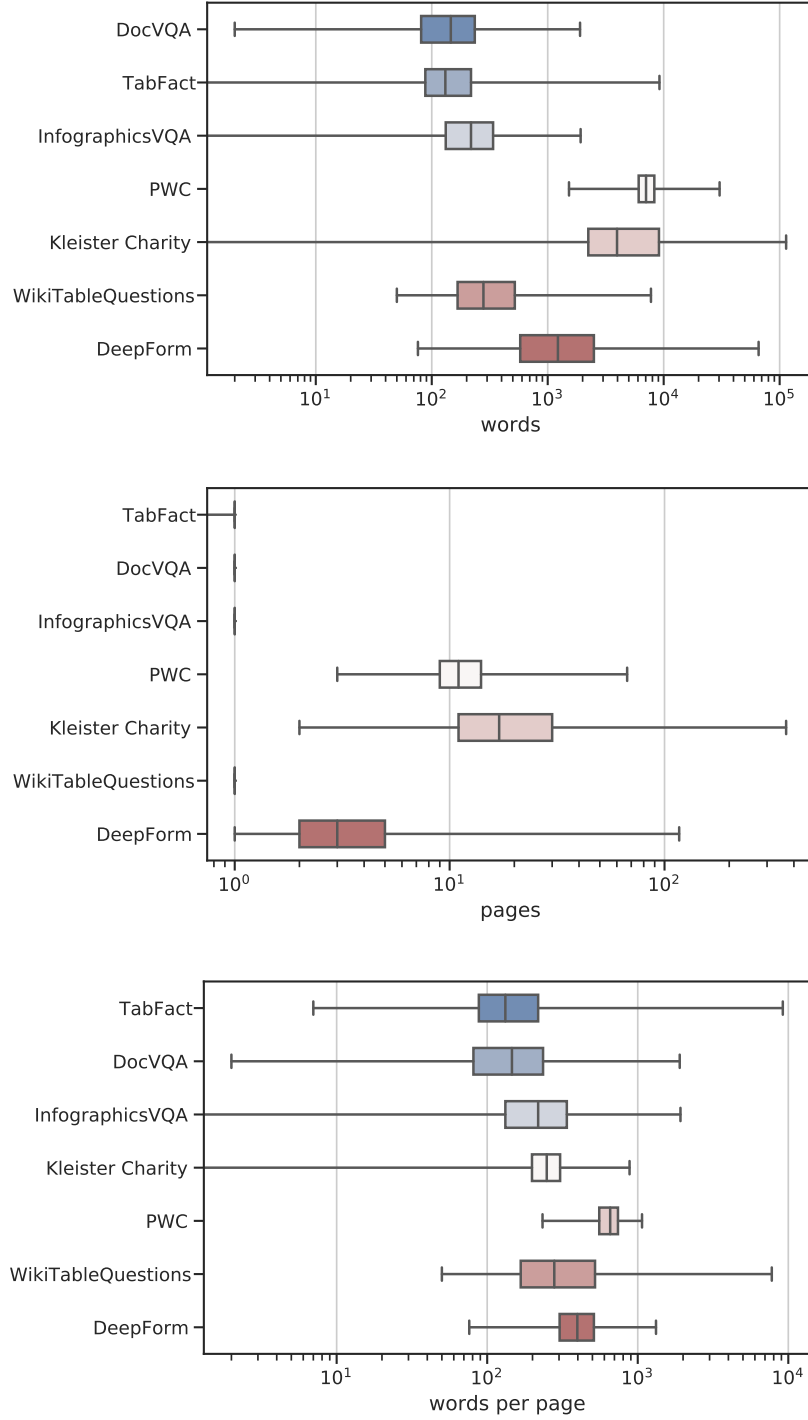

Figure 8: Number of words, pages, and words per page in particular datasets (log scale). Part of the datasets consist only of one-pagers.

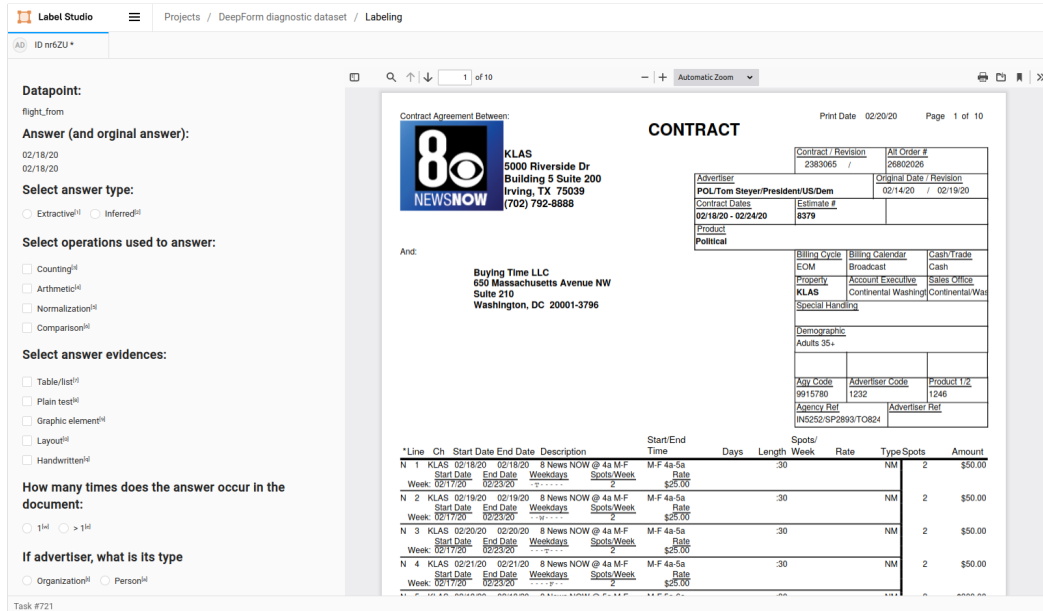

Figure 9: An example of an interface for annotating diagnostic subsets based on document from DeepForm dataset.

- 731 **Output type.** This category is based on the semantic of an output.
- 732 • Organization – the answer is a name of an organization or institution.
- 733 • Location – the answer is a geographic location globally (e.g., a country, continent, city) or locally
- 734 (building or street, among others).
- 735 • Person – the answer is a personal identifier(name, surname, pseudonym) or its composition. It
- 736 can have a title prefix or suffix (e.g., Mrs., Mr., Ph.D.) or have a shortened or informal version.
- 737 • Number – numerical values given with the unit or percent. Values written in the free text do not
- 738 comply with this class’s definition.
- 739 • Date/Time/Duration – the answer represents the date, time, or the difference between two dates
- 740 or times.
- 741 • Yes/No – the answer is a textual output of binary classification, such as Yes/No pairs, and
- 742 Positive/Negative, 0/1 among others.
- 743 **Evidence.** This category is based on the source of information that allows the correct answer to be
- 744 generated. When there are multiple justifications based on different pieces of evidence (for example,
- 745 the address is in a table and block text), it is required to select all the pieces of evidence.
- 746 • Table or List – a *table* is a fragment of the document organized into columns and rows. The
- 747 distinguishing feature of the table is consistency within rows and columns (usually the same data
- 748 type). Moreover, it may have a header. In that sense, the form is not a table (or at least it does not
- 749 have to be). A *list* is a table degenerated into one column or row containing a header.
- 750 • Plain text – the answer is based on plain text if there is an immediate need to understand a longer
- 751 fragment of the text while answering.
- 752 • Graphic element – the answer is based on graphic evidence when understanding graphically
- 753 rich, non-text fragments of documents (e.g., graphics, photos, logos (non-text)) are necessary for
- 754 generating a correct answer.
- 755 • Layout – it is evidence when comprehending the placement of text on the page (e.g., titles,
- 756 headers, footers, forms) is needed to generate the correct answer. This type does not include
- 757 tables.
- 758 • Handwritten – when the text written by hand is crucial for an answer.

759 **Operation.** This category is based on the type of operations that are to be performed on the  
760 document before reaching to the correct answer.

- 761 • Counting – when there is a need to count the occurrences or determine the position on the list.
- 762 • Arithmetic – when there is an arithmetic operation applied before answering, or a sequence of  
763 arithmetic operations (e.g., averaging).
- 764 • Comparison – a comparison in the sense of lesser/greater. Other procedures that a comparison  
765 operation can express (e.g., approximation) may be chosen. Here, the operation "is equal" is not a  
766 comparison since it is sufficient to match sequences without a semantic understanding.
- 767 • Normalization – when we are to return something in the document but in a different form. It may  
768 only apply to the output; we do not acknowledge this operation when it is required to normalize a  
769 question fragment to match it in the document.

770 **Answer number.** This category is based on the number of occurrences of an answer in the docu-  
771 ment.

- 772 • 1 – when there is one path of logical reasoning to find the correct answer in the document. We  
773 treat it as one justification for two different reasoning paths based on the same data from the  
774 document.
- 775 • > 1 – the other cases.

## 776 **F Training details**

777 The experiments were carried out in an environment with NVIDIA A100-40Gb cards, PyTorch  
778 version 1.8.1, and huggingface-transformers in version 4.2.2.

779 The parameters were selected through empirical experiments with T5-Base model on DocVQA and  
780 InfographicsVQA collections. The T5-Large model was used as the basis for finetuning.

781 The training lasted up to 30 epochs at batch 64 in training, the default optimizer AdamW (lr =  
782 0.0002), and warmup set to 100 updates. Validation was performed five times per epoch, and when  
783 no improvement was seen for 20 validation steps (4 epochs), the training was stopped. The length of  
784 the input documents has been truncated to 1024 tokens and the responses to 256 tokens. Dropout was  
785 set to 0.15, gradient clipping to 1.0, and weight decay to 1e-05.

786 The complete source code is attached as the supplementary material.

## 787 **G Considered datasets**

788 The review protocol consisted of a manual search in specific databases, repositories and distribution  
789 services. The scientific resources included in the search were:

- 790 • <https://paperswithcode.com/datasets/>
- 791 • <https://datasetsearch.research.google.com/>
- 792 • <https://data.mendeley.com/>
- 793 • <https://arxiv.org/search/>
- 794 • <https://github.com/>
- 795 • <https://allenai.org/data/>
- 796 • <https://www.semanticscholar.org/>
- 797 • <https://scholar.google.com/>

798 Results were reviewed by one of authors of the present paper and the resources related to classification,  
799 KIE, QA, MRC, and NLI over complex documents, figures, and tables were identified as potentially  
800 relevant (in accordance with inclusion criteria described in Section 3.1).

801 The initial search assumed use of the following keywords: *Question Answering*, *Visual Question*  
802 *Answering*, *Document Question Answering*, *Document Classification*, *Document Dataset*, *Information*

803 *Extraction*. Additionally, we used *Machine Reading Comprehension*, *Question Answering*, *VQA* in  
804 combination with *Document*, and *Visual*, *Document*, *Table*, *Figure*, *Plot*, *Chart*, *Hybrid* in combination  
805 with *Question Answering* or *Information Extraction*.

806 Table below lists potentially relevant tasks and results of their assessment according to the criteria of  
807 quality, difficulty, and licensing.

| Name         | Type                            | Comment                                                                                                            |      |
|--------------|---------------------------------|--------------------------------------------------------------------------------------------------------------------|------|
| Kleister NDA | KIE                             | Dominated by extraction from free text (layout is not important).                                                  | [41] |
| SROIE        | KIE                             | No room for improvement.                                                                                           | [17] |
| CORD         | KIE                             | No room for improvement.                                                                                           | [35] |
| Wildreceipt  | KIE                             | Very similar to SROIE and CORD. No room for improvement as the main problem is poor OCR quality.                   | [43] |
| FUNSD        | KIE                             | Small dataset size (measured in number of data points) and known disadvantages [50].                               | [22] |
| TextbookQA   | Document VQA                    | Source files are not available (only images and free text). In the meantime, the used online textbook has changed. | [25] |
| PlotQA       | Figure QA                       | Synthetic                                                                                                          | [31] |
| WebSRC       | KIE                             | Templated input data (both questions and web-sites).                                                               | [5]  |
| MultiModalQA | QA over Tables, Images and Text | Automatically generated questions.                                                                                 | [45] |
| WikiOPS      | Table QA                        | No room for improvement.                                                                                           | [8]  |
| FeTaQA       | Table QA                        | Wikipedia Tables. Answers as a free-form text                                                                      | [32] |
| TabMCQ       | Table QA                        | Low number of tables used.                                                                                         | [20] |
| LEAF-QA      | Figure QA                       | Templated questions.                                                                                               | [4]  |
| VisualMRC    | Document VQA                    | No room for improvement (human performance reached)'.                                                              | [47] |
| DocFigure    | Classification                  | No room for improvement.                                                                                           | [23] |
| Tabacco3482  | Classification                  | No room for improvement.                                                                                           |      |
| RVL-CDIP     | Classification                  | No room for improvement.                                                                                           | [15] |
| EURLEX57K    | Classification                  | Dominated by extraction from free text (layout is not important).                                                  | [3]  |
| MELINDA      | Classification                  | The dataset was annotated in semi-automatic manner.                                                                | [53] |
| DWIE         | IE                              | Dominated by extraction from free text (layout is not important).                                                  | [61] |
| HybridQA     | Table QA                        | Multihop Question Answering.                                                                                       | [7]  |

## 808 H Benchmark datasheet

809 Following Gebre et al. [13] we fill the datasheet for the proposed benchmark. As it was originally  
810 designed for datasets, part of the questions might not apply and were skipped.

### 811 H.1 Motivation for datasheet creation

812 **Why was the benchmark created?** Despite its importance for digital transformation, the problem  
813 of measuring how well available models obtain information from a wide range of document types  
814 and how suitable they are for freeing workers from paperwork through process automation is not  
815 yet addressed. We intend to bridge this major gap by introducing the first Document Understanding  
816 benchmark.

817 **Has the benchmark been used already? If so, where are the results so others can compare (e.g.,  
818 links to published papers)?** No, the paper describes the first version of the benchmark.

819 **Who funded the creation dataset?** Applica.ai

## 820 **H.2 Benchmark composition**

821 **What are the instances?(that is, examples; e.g., documents, images, people, countries) Are**  
822 **there multiple types of instances? (e.g., movies, users, ratings; people, interactions between**  
823 **them; nodes, edges)** Single instance is a PDF document such as report, scientific publication, form,  
824 infographic or table excerpted from websites. For each instance in train and dev split we provide  
825 associated question-answer or property-value pairs.

826 **How many instances are there in total (of each type, if appropriate)?** DocVQA totals 12.8k  
827 examples, InfographicsVQA totals 5.5k, Kleister Charity totals 2.7k, PWC totals 0.4k, DeepForm  
828 totals 1.1k, WikiTableQuestions totals 2.1k and TabFact totals 16.6k

829 **What data does each instance consist of ? “Raw” data (e.g., unprocessed text or images)? Fea-**  
830 **tures/attributes? Is there a label/target associated with instances? If the instances related to**  
831 **people, are subpopulations identified (e.g., by age, gender, etc.) and what is their distribution?**  
832 OCR layer from scanned PDF, textual question (or property) and textual answer (value), meta-data  
833 and diagnostic information.

834 **Is there a label or target associated with each instance? If so, please provide a description.**  
835 Yes, there is an answer or multiple allowed answers specified for each instance.

836 **Is any information missing from individual instances? If so, please provide a description,**  
837 **explaining why this information is missing (e.g., because it was unavailable). This does not**  
838 **include intentionally removed information, but might include, e.g., redacted text.** For each  
839 instance we provide output from OCR tools (Tesseract, Microsoft Computer Vision API, djvu).  
840 However, few documents are problematic for OCR engines and for them we were not able to generate  
841 text and layout layer.

842 **Are relationships between individual instances made explicit (e.g., users’ movie ratings, social**  
843 **network links)? If so, please describe how these relationships are made explicit.** Yes, they  
844 contain metadata that informs about the id of the document that was used for the instance. Different  
845 instances may share the same underlying document.

846 **Are there recommended data splits (e.g., training, development/validation, testing)? If so,**  
847 **please provide a description of these splits, explaining the rationale behind them.** For five  
848 out of seven tasks from our benchmark we used original datasets splits. The two datasets in which we  
849 changed splits are:

850 *DeepForm.* The original DeepForm dataset consists of 2012, 2014, and 2020 subsets differing in  
851 terms of annotation quality and documents’ diversity. We decided to use only the 2020 subset as  
852 for 2014, and 2020 annotations were prepared either automatically or by volunteers, leading to  
853 questionable quality. The selected subset was randomly divided into training, development and test  
854 set. In addition to the improved 2020 subset, we manually annotated one hundred 2012 documents,  
855 as they can pose different challenges (contain different document templates, handwriting, have lower  
856 image quality). They were used to extend development and test set. The final dataset consists of 700  
857 training, 100 development, and 300 test set documents.

858 *WikiTableQuestions.* The original WTQ dataset consists of training, pristine-seen-tables, and pristine-  
859 unseen-tables subsets. We treat pristine-unseen-tables as a test set and create new training and  
860 development sets by rearranging data from training and pristine-seen-tables. The latter operation  
861 is dictated by the leakage of documents in the original formulation, i.e., we consider it undesirable  
862 for a document to appear in different splits, even if the question differs. The resulting dataset  
863 consists of approximately 2100 documents divided in the proportion of 65%, 15%, 20% into training,  
864 development, and test sets.

865 **Are there any errors, sources of noise, or redundancies in the dataset? If so, please provide a**  
866 **description.** In our benchmark we have two sources of errors:

867 *Annotations.* For each task we provided human performance estimation which shows how often the  
868 annotators were in agreement with each other (what is the level of annotation noise).

869 *OCR output.* As an input for all tasks we used PDF files. Therefore, we used OCR tools (which is no  
870 perfect) to retrieve text and layout layer (token bounding boxes).

871 **Is the benchmark self-contained, or does it link to or otherwise rely on external resources (e.g.,**  
872 **websites, tweets, other datasets)? If it links to or relies on external resources, a) are there**  
873 **guarantees that they will exist, and remain constant, over time; b) are there official archival**  
874 **versions of the complete dataset (i.e., including the external resources as they existed at the**  
875 **time the dataset was created); c) are there any restrictions (e.g., licenses, fees) associated with**  
876 **any of the external resources that might apply to a future user? Please provide descriptions**  
877 **of all external resources and any restrictions associated with them, as well as links or other**  
878 **access points, as appropriate.** Despite the fact that the benchmark aggregates dataset published  
879 in various sources it is self-contained. To eliminate some of the barriers in future experiments, we  
880 proposed a format to unify varied Document Understanding tasks and convert all of the datasets  
881 included in the benchmark. Additionally, we provide versioned OCR layers for scanned documents  
882 to make models evaluated in the future directly comparable.

883 All of these resources are provided on the benchmark website, without a need to download them from  
884 external sources.

### 885 H.3 Collection Process

886 **What mechanisms or procedures were used to collect the data (e.g., hardware apparatus or sen-**  
887 **sor, manual human curation, software program, software API)? How were these mechanisms**  
888 **or procedures validated?** For WikiTableQuestions, we prepare input documents by rendering  
889 table-related HTML distributed by authors in *wkhtmltopdf* and crop the resulting files with *pdfcrop*.  
890 As these code excerpts do not contain *head* tag with JavaScript and stylesheet references, we use the  
891 header from the present version of the Wikipedia website.

892 As the authors of TabFact distribute only CSV files, we resorted to HTML from the WikiTables dump  
893 their CSV were presumably generated from.<sup>6</sup> As Chen et al. [6] dropped some of the columns present  
894 in used WikiTable tables, we remove them too, to ensure compatibility with the original TabFact.  
895 Rendered files are used analogously to the case of WTQ.

896 The remaining datasets had their data kept in the original form. Used procedures were designed and  
897 validated in an iterative manner by: (1) validating all generated documents against original source  
898 (CSV) and (2) checking a random sample of 200 documents manually looking for anomalies. If any  
899 errors were detected, the processing software was fixed and the validation procedure started again.

900 **Who was involved in the data collection process (e.g., students, crowdworkers, contractors)**  
901 **and how were they compensated (e.g., how much were crowdworkers paid)?** Estimation of  
902 human performance for PWC, WikiTableQuestions, DeepForm and annotation of diagnostic subsets  
903 was performed in-house (at Applica.ai) by professional annotators in their work time.

### 904 H.4 Data Preprocessing

905 **Was any preprocessing/cleaning/labeling of the data done (e.g., discretization or bucketing,**  
906 **tokenization, part-of-speech tagging, SIFT feature extraction, removal of instances, processing**  
907 **of missing values)? If so, please provide a description. If not, you may skip the remainder of the**  
908 **questions in this section.** We provide OCR layers for PDF documents to make models evaluated  
909 in the future directly comparable.

910 **Was the “raw” data saved in addition to the preprocessed/cleaned/labeled data (e.g., to support**  
911 **unanticipated future uses)? If so, please provide a link or other access point to the “raw” data.**  
912 The original PDF files are hosted on the <https://duebenchmark.com/data> and can be downloaded from  
913 there.

---

<sup>6</sup><http://websail-fe.cs.northwestern.edu/TabEL/tables.json.gz>

914 **Is the software used to preprocess/clean/label the instances available? If so, please provide a**  
915 **link or other access point.** To preprocess all documents we have used two OCR tools:

- 916 1. Tesseract in version 4.1.1<sup>7</sup>
- 917 2. Microsoft Azure Computer Vision API (Azure CV) in version 3.0.0<sup>8</sup>

918 To estimate human performance and for annotation diagnostic datasets we used open source Label-  
919 Studio<sup>9</sup> software (screenshots is provided in the paper appendix for reference).

## 920 **H.5 Dataset Distribution**

921 **How will the dataset be distributed? (e.g., tarball on website, API, GitHub; does the data have**  
922 **a DOI and is it archived redundantly?)** All datasets from our benchmark are available on the  
923 <https://duebenchmark.com/data> and can be downloaded from there. Moreover, for each dataset we  
924 provide JSON-LD file<sup>10</sup> with detailed description.

925 **When will the dataset be released/first distributed? What license (if any) is it distributed**  
926 **under?** We released all datasets already. We used original license for all datasets that we selected  
927 to our benchmark.

928 **Are there any fees or access/export restrictions?** No.

## 929 **H.6 Dataset Maintenance**

930 **Who is supporting/hosting/maintaining the dataset?** Applica.ai

931 **Will the dataset be updated? If so, how often and by whom?** No.

932 **If the dataset becomes obsolete how will this be communicated?** We will notify users on bench-  
933 mark site: <https://duebenchmark.com/>

934 **Is there a repository to link to any/all papers/systems that use this dataset?** Everyone who  
935 want to use our benchmark should submit their results via site <https://duebenchmark.com/>. The  
936 submission should also contain reference to the paper.

937 **Any other comments?** We are not planning to update prepared datasets in our benchmark but we  
938 consider to prepare second version of our benchmark in the future (with updated list of datasets).

## 939 **H.7 Legal and Ethical Considerations**

940 **Were any ethical review processes conducted (e.g., by an institutional review board)? If so,**  
941 **please provide a description of these review processes, including the outcomes, as well as a**  
942 **link or other access point to any supporting documentation.** In our benchmark we are using  
943 datasets which were collected by other researchers and therefore we do not conduct any ethical review  
944 processes. Moreover, all datasets are already available.

945 **Does the dataset contain data that might be considered confidential (e.g., data that is protected**  
946 **by legal privilege or by doctor/patient confidentiality, data that includes the content of individ-**  
947 **uals non-public communications)? If so, please provide a description.** No.

948 **Does the dataset contain data that, if viewed directly, might be offensive, insulting, threatening,**  
949 **or might otherwise cause anxiety? If so, please describe why** No.

---

<sup>7</sup><https://github.com/tesseract-ocr/tesseract/releases/tag/4.1.1>

<sup>8</sup><https://docs.microsoft.com/en-us/azure/cognitive-services/computer-vision/overview-ocr>

<sup>9</sup><https://labelstud.io/>

<sup>10</sup><https://developers.google.com/search/docs/data-types/dataset>

950 **Does the dataset relate to people? If not, you may skip the remaining questions in this section.**

951 *DocVQA*. No.

952 *InfographicsVQA*. No.

953 *Kleister Charity*. No.

954 *PWC*. Yes.

955 *DeepForm*. Yes.

956 *WikiTableQuestions*. Yes.

957 *TabFact*. Yes.

958

959 **Does the dataset identify any subpopulations (e.g., by age, gender)? If so, please describe how**  
960 **these subpopulations are identified and provide a description of their respective distributions**  
961 **within the dataset.** No.

962 **Is it possible to identify individuals (i.e., one or more natural persons), either directly or**  
963 **indirectly (i.e., in combination with other data) from the dataset? If so, please describe how.**

964 *DocVQA*. No.

965 *InfographicsVQA*. No.

966 *Kleister Charity*. No.

967 *PWC*. Yes — we can check what are the authors of the publications.

968 *DeepForm*. Yes — in this dataset we are processing receipts from political campaign ads bought  
969 around US elections. Sometimes on these forms we could find politician person names.

970 *WikiTableQuestions*. Yes - data comes from Wikipedia so we can check person indirectly by going to  
971 Wikipedia page from which table was extracted.

972 *TabFact*. Yes — data comes from Wikipedia so we can check person indirectly by going to Wikipedia  
973 page from which table was extracted.

974

975 **Does the dataset contain data that might be considered sensitive in any way (e.g., data that**  
976 **reveals racial or ethnic origins, sexual orientations, religious beliefs, political opinions or**  
977 **union memberships, or locations; financial or health data; biometric or genetic data; forms**  
978 **of government identification, such as social security numbers; criminal history)? If so, please**  
979 **provide a description.** *DocVQA*. No.

980 *InfographicsVQA*. No.

981 *Kleister Charity*. No.

982 *PWC*. No.

983 *DeepForm*. Yes — we have information on how much money a given person donated to support the  
984 presidency campaign (but this information is publicly available).

985 *WikiTableQuestions*. No.

986 *TabFact*. No.

987

988 **Did you collect the data from the individuals in question directly, or obtain it via third parties**  
989 **or other sources (e.g., websites)?** We used data collected by other researchers.
